# Supplementary material for: Re/Ir@Os-doping induced insulator-to-metal transition in Mott-insulator Ca2FeOsO6: octahedral distortion effects
Source: Royal Society of Chemistry journal article supplement (doi:10.1039/d4cp00746h), 2024-01-01
Supplement: d4cp00746h1.pdf [file d4cp00746h1.pdf]

## Supporting Information

### Re/Ir@Os-Doping Induced Insulator-to-Metal Transition in a Mott-Insulator $\text{Ca}_2\text{FeOsO}_6$ : Octahedral Distortions Effects

S. Nazir\*

*Department of Physics, University of Sargodha, 40100 Sargodha, Pakistan*

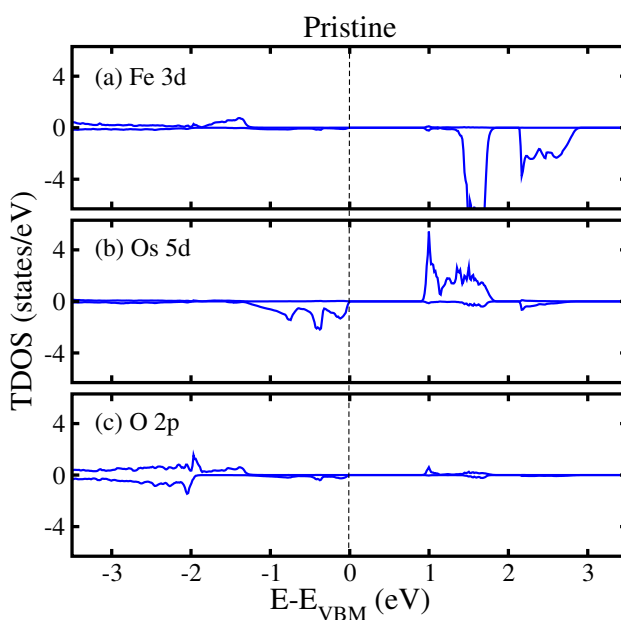

FIG. 1S: (Color online) GGA+ $U$ +SOC computed non-degenerate orbital-resolved partial density of states (PDOS) on the (a) Fe 3d, (b) Os 5d, and (c) O 2p states of the pristine  $\text{Ca}_2\text{FeOsO}_6$  double perovskite oxide in the most stable ferrimagnetic ground state.

---

\* Electronic address: [safdar.nazir@uos.edu.pk](mailto:safdar.nazir@uos.edu.pk)
